# Supplementary material
Source: HighWire-hosted journal article supplement (https://jnm.snmjournals.org/highwire/filestream/99046/field_highwire_adjunct_files/0/236935_Supplemental_Data.pdf)
Supplement: 236935_Supplemental_Data.pdf [file 236935_Supplemental_Data.pdf]

**Supplemental Table 1:** Comparison of baseline clinical and tumor characteristics, including PET-derived values, between patients with controlled and uncontrolled disease. Values are presented as mean  $\pm$  SD or number of patients.

|                                          | <b>Controlled (n = 23)</b> | <b>Uncontrolled (n = 19)</b> | <b>p-value</b> |
|------------------------------------------|----------------------------|------------------------------|----------------|
| Age (years)                              | 63 $\pm$ 10                | 58 $\pm$ 12                  | 0.128          |
| Sex                                      |                            |                              | 0.536          |
| Male                                     | 13                         | 8                            |                |
| Female                                   | 10                         | 11                           |                |
| Ki67 (%)                                 | 4.5 $\pm$ 5.1              | 9.9 $\pm$ 12.3               | 0.025          |
| Time between diagnosis and PRRT (months) | 63 $\pm$ 51                | 48 $\pm$ 40                  | 0.300          |
| IBI                                      |                            |                              | 0.267          |
| 0                                        | 20                         | 13                           |                |
| > 0                                      | 3                          | 5                            |                |
| Baseline SUV <sub>max</sub>              | 29.3 $\pm$ 9.5             | 22.4 $\pm$ 8.9               | 0.022          |
| Baseline SUV <sub>mean</sub>             | 12.7 $\pm$ 3.6             | 10.1 $\pm$ 2.8               | 0.012          |
| Baseline TV (ml)                         | 453 $\pm$ 477              | 591 $\pm$ 785                | 0.860          |
| Baseline TLA (SUV*ml)                    | 5935 $\pm$ 6080            | 6088 $\pm$ 8323              | 0.668          |
| Baseline SUV <sub>T/S</sub>              | 2.03 $\pm$ 1.07            | 1.52 $\pm$ 1.05              | 0.075          |

Ki67: Ki-67 proliferation index; PRRT: peptide receptor radionuclide therapy; IBI: inflammation-based-index; SUV: standardized uptake value; TV: tumor volume; TLA: total lesion activity; T/S: tumor-to-spleen ratio
